# Supplementary material for: Reasons for the yellowness of photocured samples by the benzophenone/1,3-benzodioxole photoinitiating system
Source: Royal Society of Chemistry journal article supplement (doi:10.1039/c5nj00575b), 2015-01-01
Supplement: c5nj00575b1.pdf [file c5nj00575b1.pdf]

## Supporting Information

### Reasons for yellowness of photocured sample by benzophenone/1,3-benzodioxole photoinitiating system

Jinliang Yang,<sup>a,b</sup> Suqing Shi,<sup>c\*</sup> Jun Nie<sup>a,b\*</sup>

<sup>a</sup> Changzhou Institute of Advanced Materials, Beijing University of Chemical Technology, Changzhou, Jiangsu, 213164, P. R. China

<sup>b</sup> State Key Laboratory of Chemical Resource Engineering & Beijing Laboratory of Biomedical Materials, Beijing University of Chemical Technology, Beijing 100029, P.R. China.;

<sup>c</sup> Key Laboratory of Synthetic and Natural Functional Molecule Chemistry of Ministry of Education and Department of Chemistry, Northwest University, Xi'an 710069, P.R. China;

138  
10

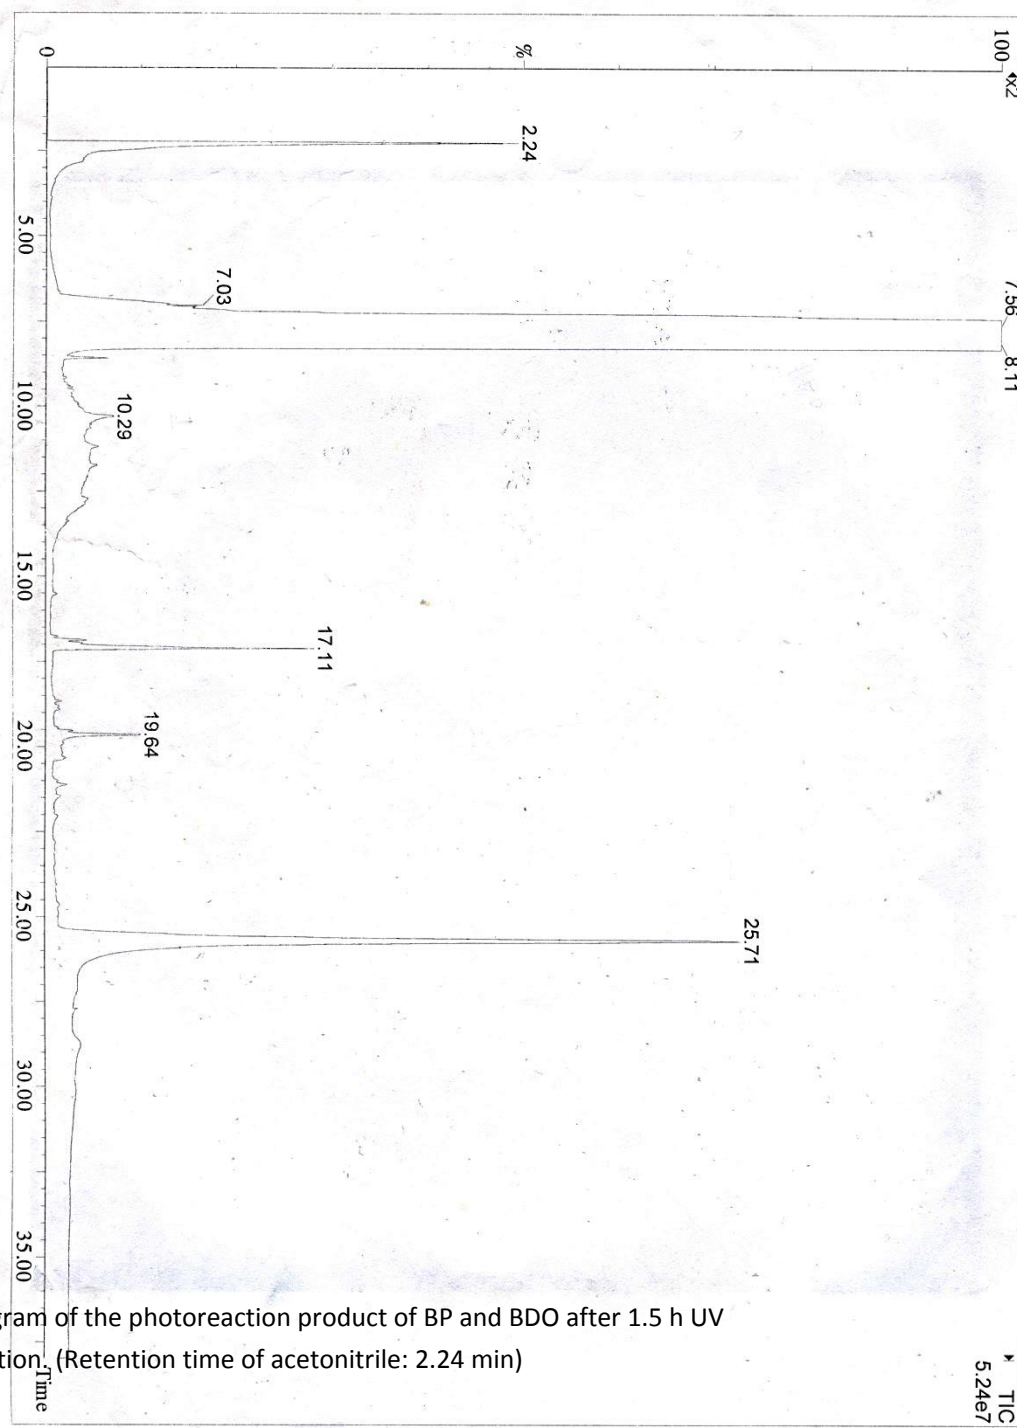

Figure S1. GC chromatogram of the photoreaction product of BP and BDO after 1.5 h UV irradiation. (Retention time of acetonitrile: 2.24 min)

TIC  
5.24e7

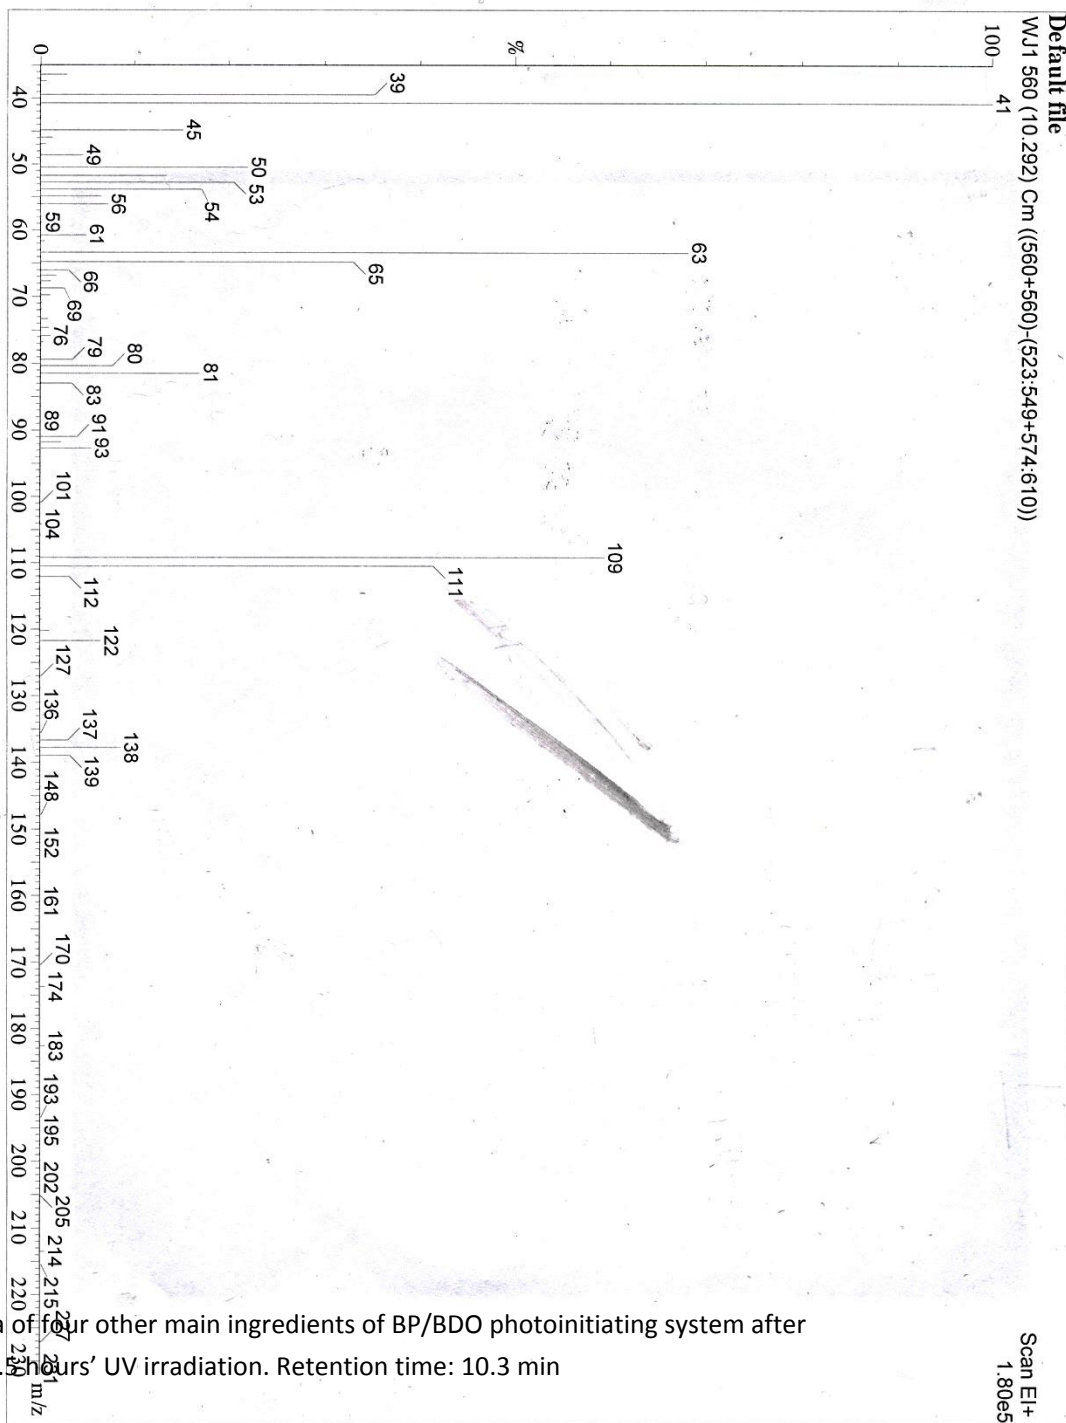

Figure S2. Mass spectra of four other main ingredients of BP/BDO photoinitiating system after 1.8 hours' UV irradiation. Retention time: 10.3 min

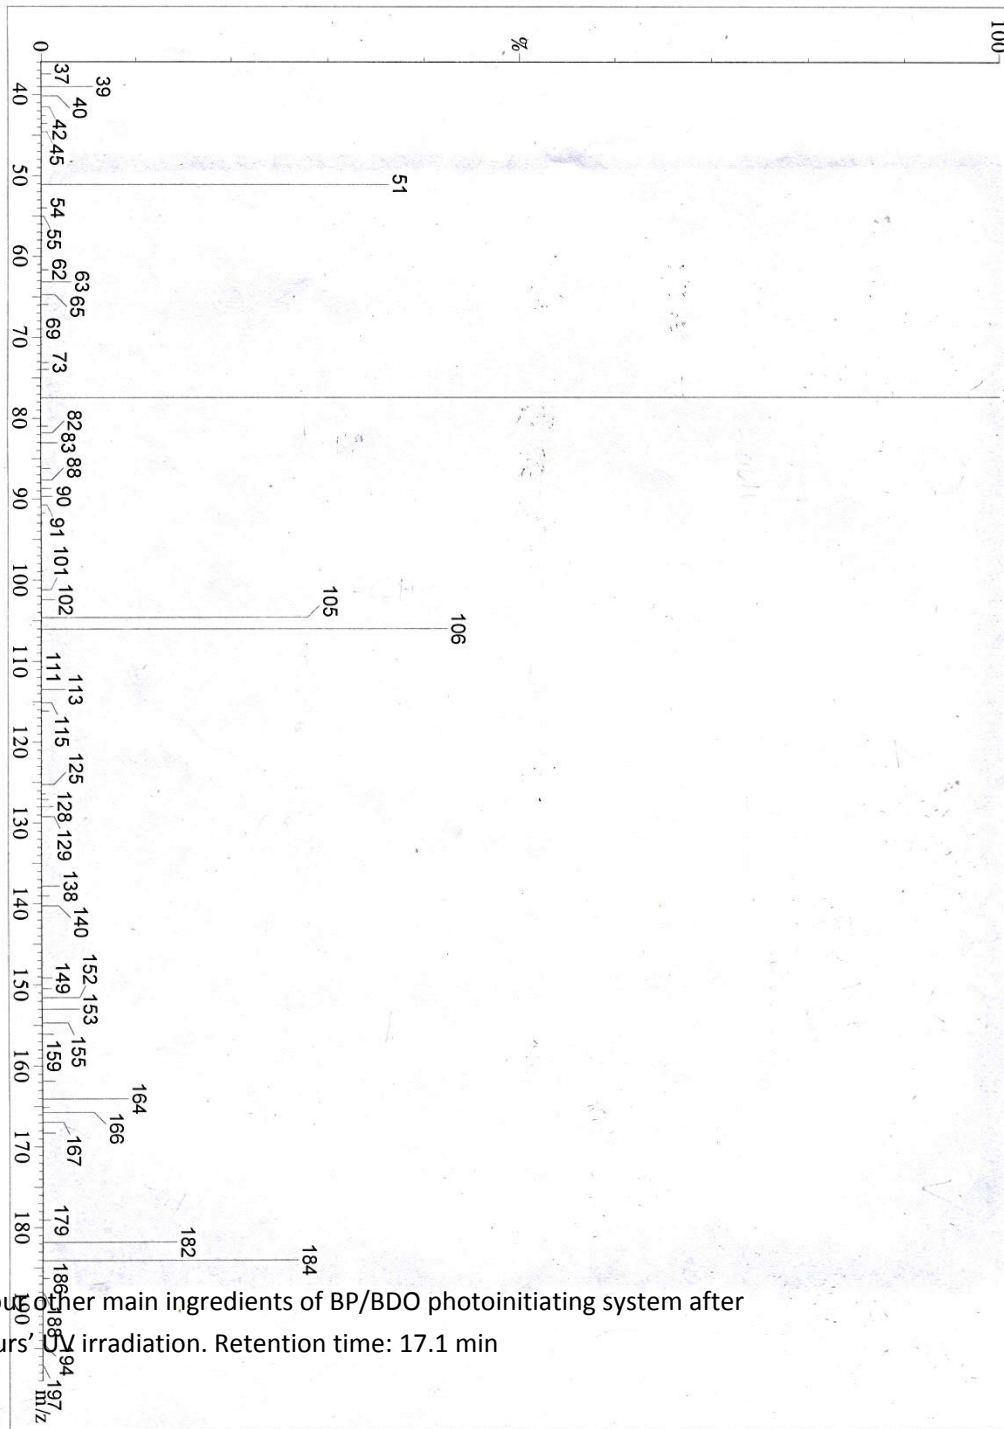

Figure S3. Mass spectra of four other main ingredients of BP/BDO photoinitiating system after 1.5 hours, UV irradiation. Retention time: 17.1 min

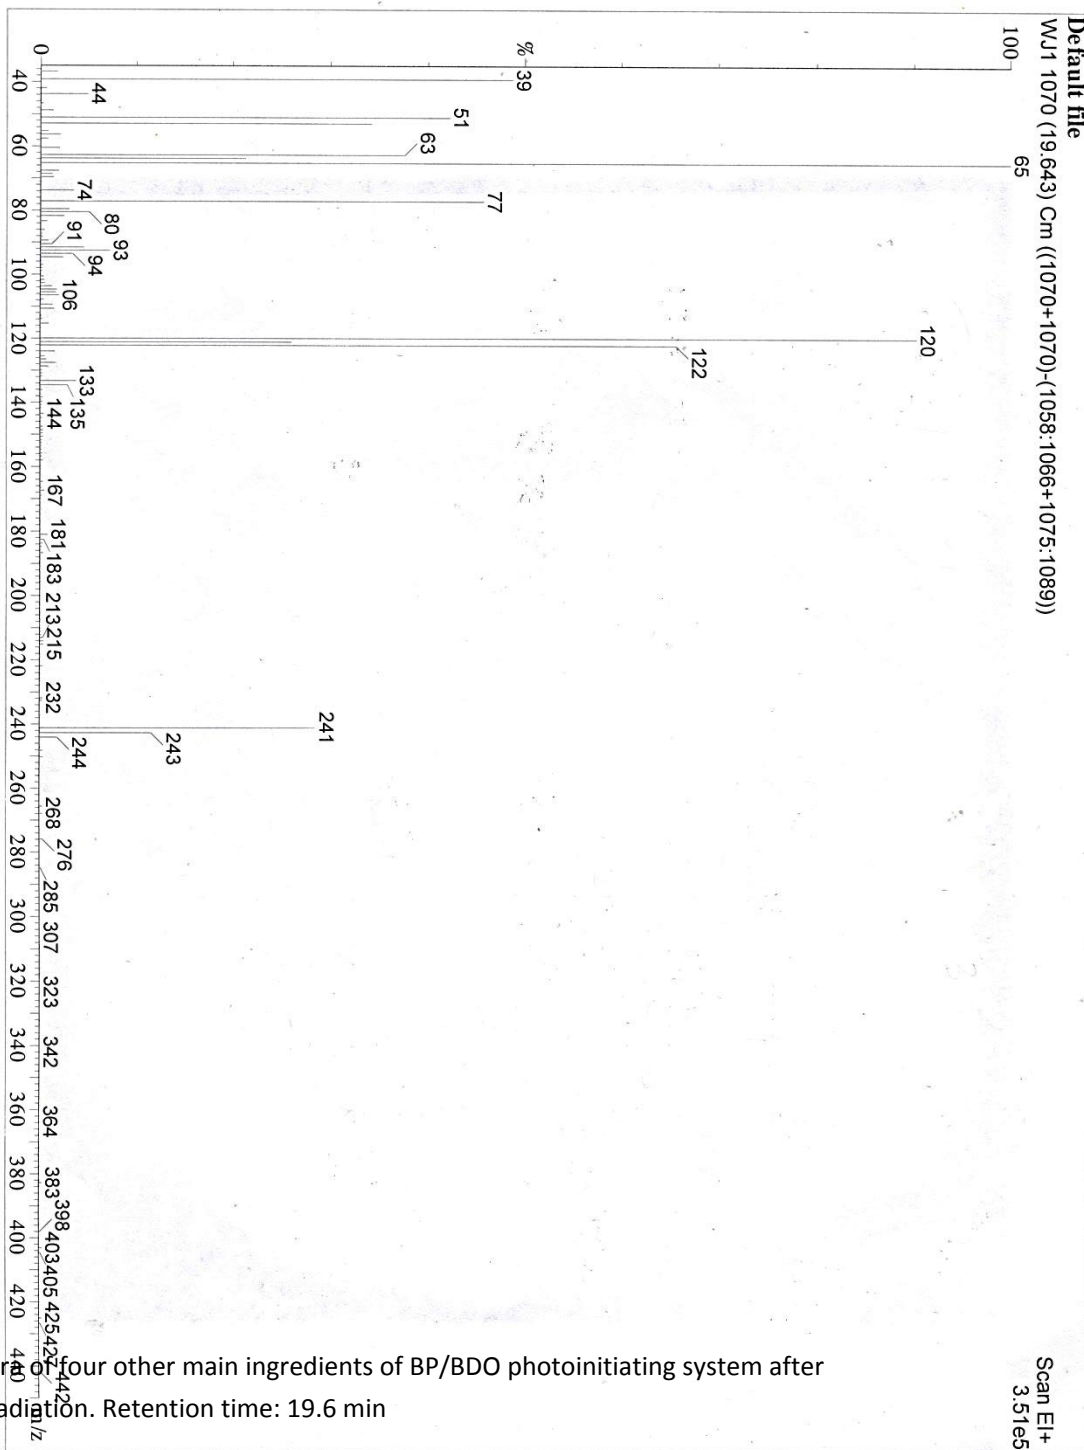

Figure S4. Mass spectrum of four other main ingredients of BP/BDO photoinitiating system after 1.5 hours' UV irradiation. Retention time: 19.6 min

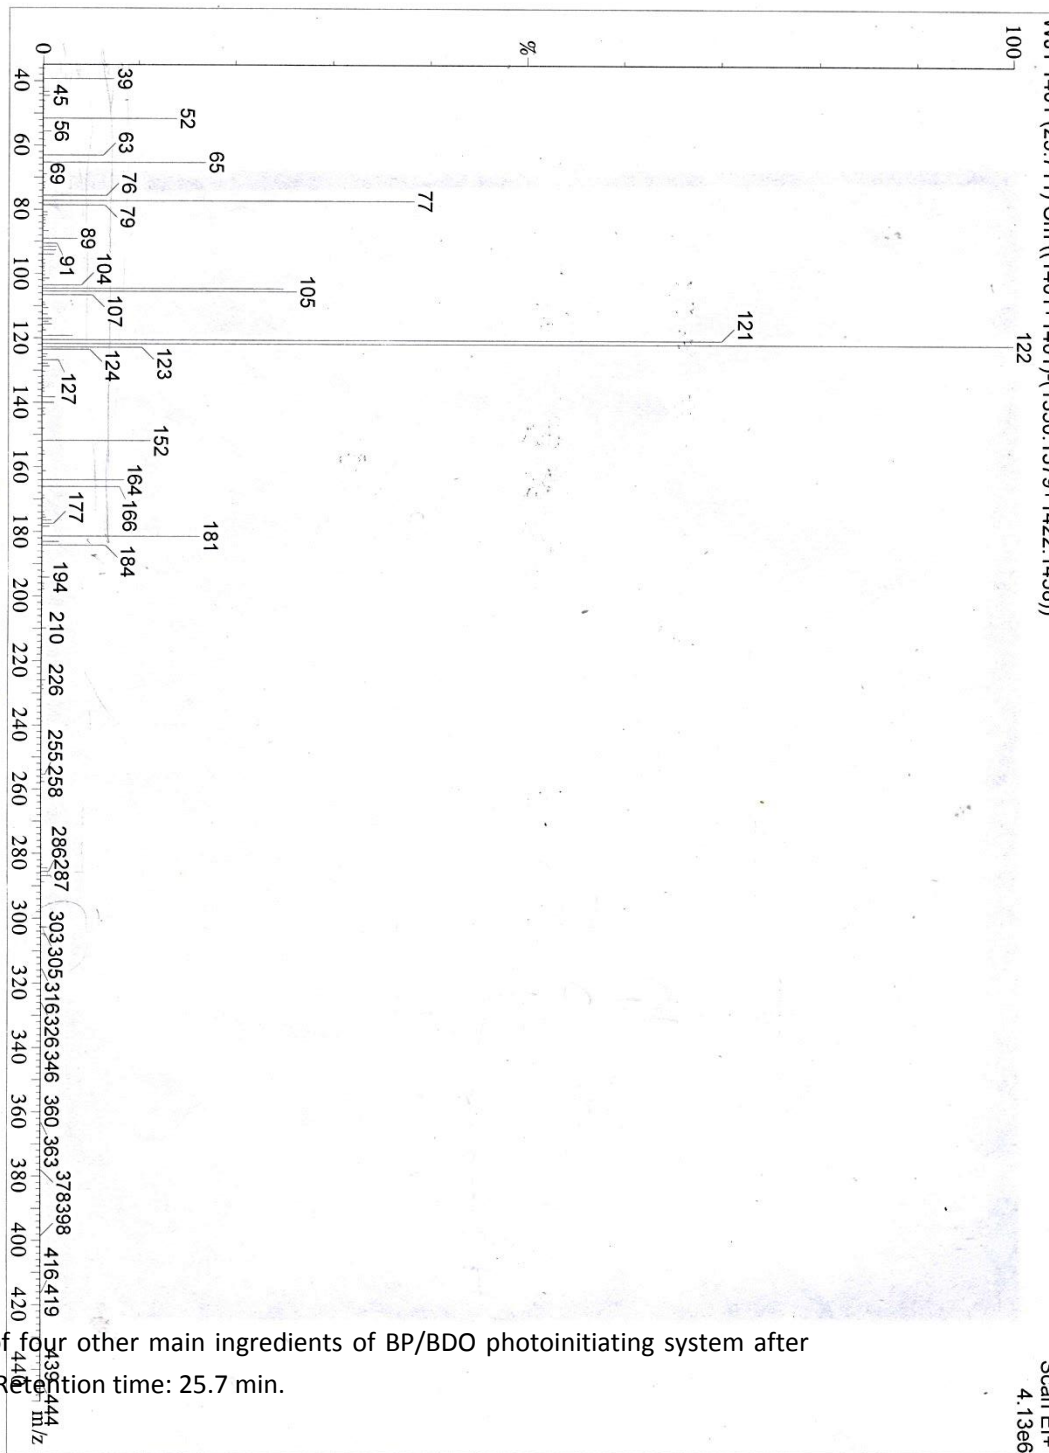

Figure S5. Mass spectra of four other main ingredients of BP/BDO photoinitiating system after 1.5 hours' UV irradiation. Retention time: 25.7 min.
